# Supplementary material
Source: Royal Society of Chemistry journal article supplement (doi:10.1039/d6ay00153j)
Supplement: d6ay00153j1.pdf [file d6ay00153j1.pdf]

## Supporting Information

### A Dot-Array Magnetic Enrichment Strategy for Rapid, Multiplexed Detection of Viable Bacteria via ATP Bioluminescence

#### Supplementary Figures

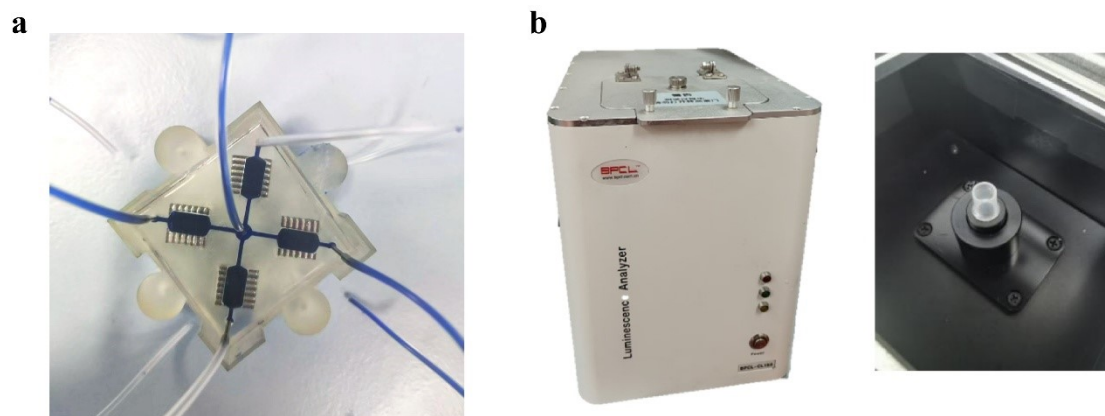

**Fig. S1.** Physical images of the microfluidic device and the luminescence analyzer. **a** Physical image of the microfluidic device. **b** BPCL-CL150 Luminescence Analyzer.

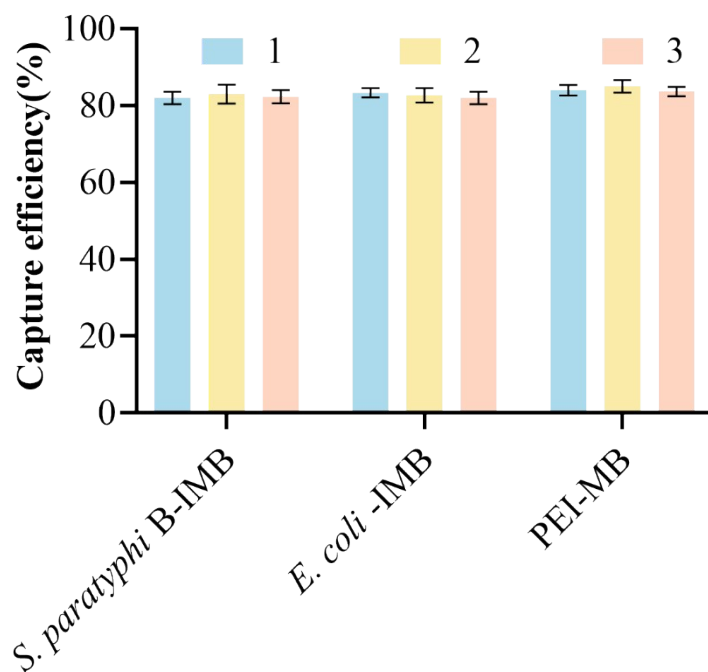

**Fig. S2.** Batch-to-Batch Reproducibility of Capture Efficiency for Functionalized Magnetic Beads

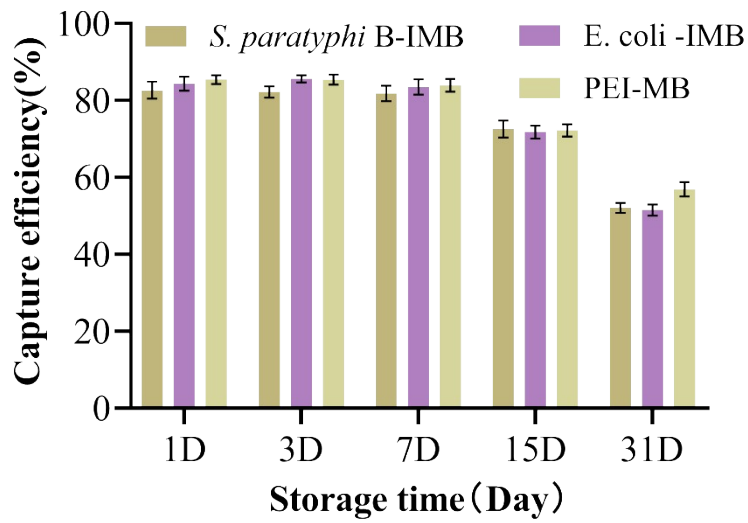

Fig. S3 Storage stability of functionalized magnetic beads at 4°C

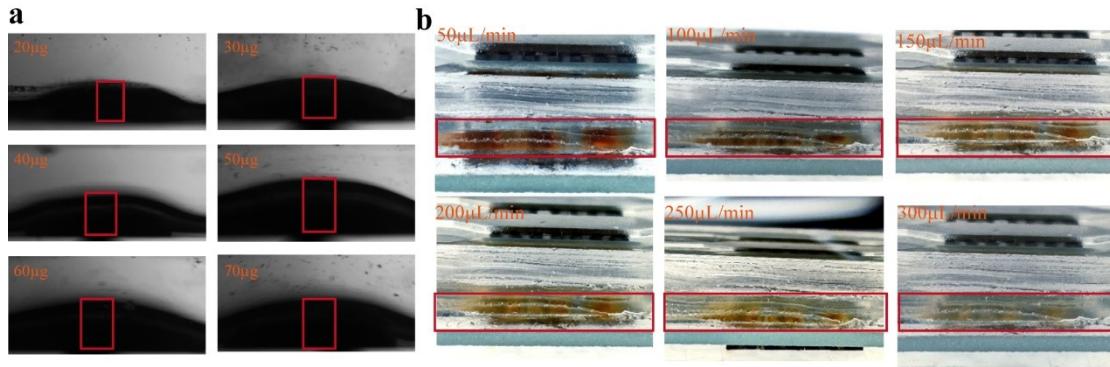

Fig. S4. Optimization of magnetic bead amount and fluid flow rate. **a** Effect of magnetic bead amount on the height of the bead chain. At a constant flow rate, the bead chain height gradually increases with increasing bead amount.

**b** Effect of fluid flow rate on the stability of the bead chain.

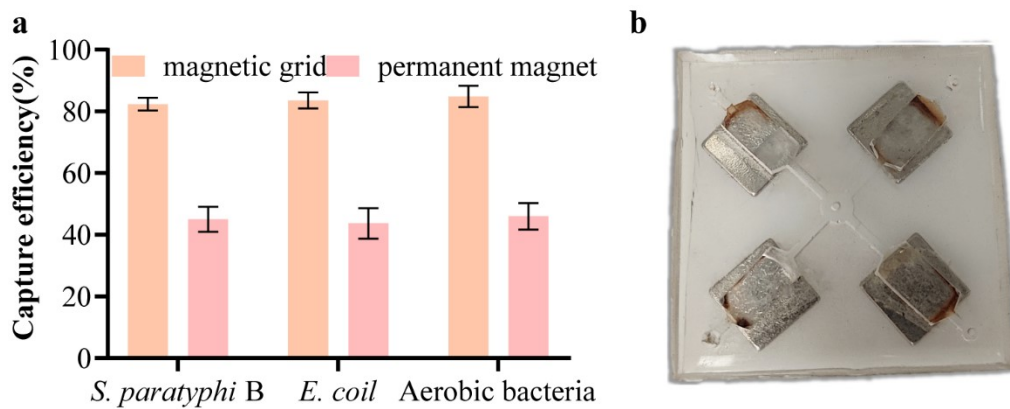

Fig. S5. **a** Comparison of bacterial capture efficiency: Magnetic grating versus single-point permanent magnet. **b** Distribution of functionalized magnetic beads in the microfluidic channel under the action of the permanent magnet

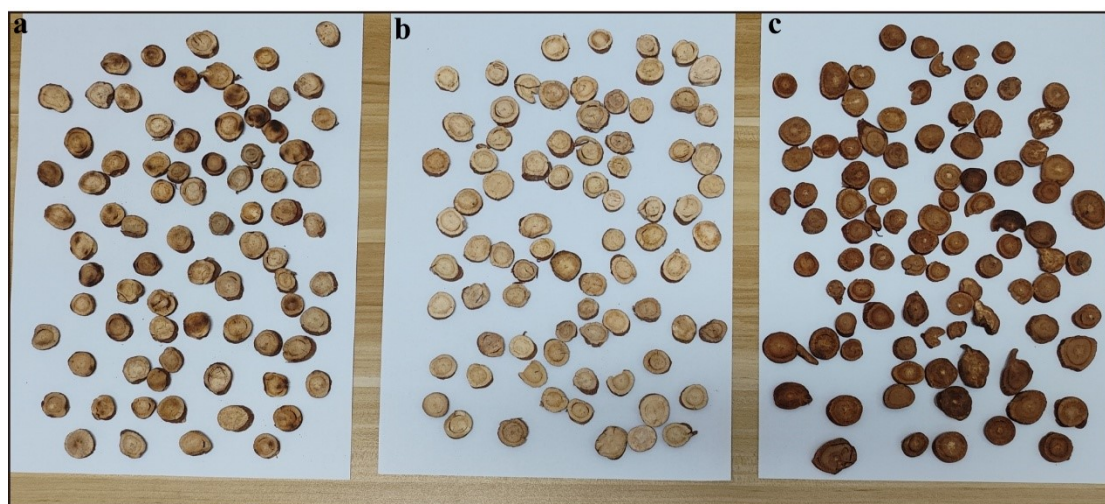

**Fig. S6.** **a** stir-fried licorice. **b** raw licorice. **c** honey-fried licorice.

**Table S1.** Recovery results of three spiked bacteria in raw licorice ( $n = 3$ )

| Sample | Microorganism         | Theoretical (CF U/mL) | Developed method (CF U/mL) | Recovery (%) | RSD (%) |
|--------|-----------------------|-----------------------|----------------------------|--------------|---------|
| RL     | <i>S. paratyphi</i> B | $1.56 \times 10^3$    | $4.87 \times 10^5$         | 96           | 4.08    |
| RL     | <i>S. paratyphi</i> B | $1.56 \times 10^4$    | $7.11 \times 10^6$         | 101          | 2.02    |
| RL     | <i>S. paratyphi</i> B | $1.56 \times 10^5$    | $6.39 \times 10^7$         | 98           | 2.50    |
| RL     | <i>E. coil</i>        | $1.42 \times 10^3$    | $2.42 \times 10^5$         | 93           | 2.19    |
| RL     | <i>E. coil</i>        | $1.42 \times 10^4$    | $4.48 \times 10^6$         | 102          | 2.95    |
| RL     | <i>E. coil</i>        | $1.42 \times 10^5$    | $2.35 \times 10^7$         | 95           | 1.74    |
| RL     | Aerobic               | $1.75 \times 10^3$    | $2.70 \times 10^5$         | 95           | 3.75    |
| RL     | Aerobic               | $1.75 \times 10^4$    | $4.64 \times 10^6$         | 101          | 1.02    |
| RL     | Aerobic               | $1.75 \times 10^5$    | $3.62 \times 10^7$         | 99           | 1.67    |

**Table S2.** Two-way ANOVA of the effects of incubation time and microbial species on microbial counts in licorice samples

| Herbal pieces | Source of Variation         | DF | F-value | P-value | % of Total Variation |
|---------------|-----------------------------|----|---------|---------|----------------------|
| HFL           | Incubation time             | 2  | 363.7   | <0.0001 | 94.14                |
|               | Microbial                   | 2  | 12.2    | 0.0027  | 3.159                |
|               | Incubation time * Microbial | 4  | 2.974   | 0.0805  | 1.54                 |

|     |                 |   |       |         |        |
|-----|-----------------|---|-------|---------|--------|
| SFL | Incubation time | 2 | 17.26 | 0.0008  | 5.823  |
|     | Microbial       | 2 | 270.6 | <0.0001 | 91.27  |
|     | Incubation time | 4 | 2.066 | 0.1682  | 1.394  |
|     | * Microbial     |   |       |         |        |
| RL  | Incubation time | 2 | 2.038 | 0.1863  | 0.6219 |
|     | Microbial       | 2 | 308.4 | <0.0001 | 94.12  |
|     | Incubation time | 4 | 6.356 | 0.0103  | 3.880  |
|     | * Microbial     |   |       |         |        |
